# Supplementary material for: Sensing platform for the highly sensitive detection of catechol based on composite coupling with conductive Ni3(HITP)2 and nanosilvers
Source: Royal Society of Chemistry journal article supplement (doi:10.1039/d3cp05391a), 2023-12-29
Supplement: d3cp05391a1.pdf [file d3cp05391a1.pdf]

### Supporting Information

The sensing platform for high sensitive detection of catechol based on the composite coupling with conductive  $\text{Ni}_3(\text{HITP})_2$  and nanosilver

Yuandong Xu <sup>a,\*</sup>, Yingying Ben <sup>a</sup>, Lili Sun <sup>a</sup>, Jishan Su <sup>a</sup>, Hui Guo <sup>a</sup>, Rongjia Zhou <sup>a</sup>,  
Yaqing Wei <sup>a</sup>, Yajun Wei <sup>b</sup>, Yongjuan Lu <sup>b</sup>, Yizhan Sun <sup>a</sup>, Xia Zhang <sup>a,\*</sup>

<sup>a</sup> School of Chemistry and Chemical Engineering, Henan University of Technology,  
Zhengzhou 450001, China

<sup>b</sup> School of Chemical Engineering, Northwest Minzu University, Lanzhou 730030,  
China

Corresponding Author: Xia Zhang (Email: zhx8206@126.com)

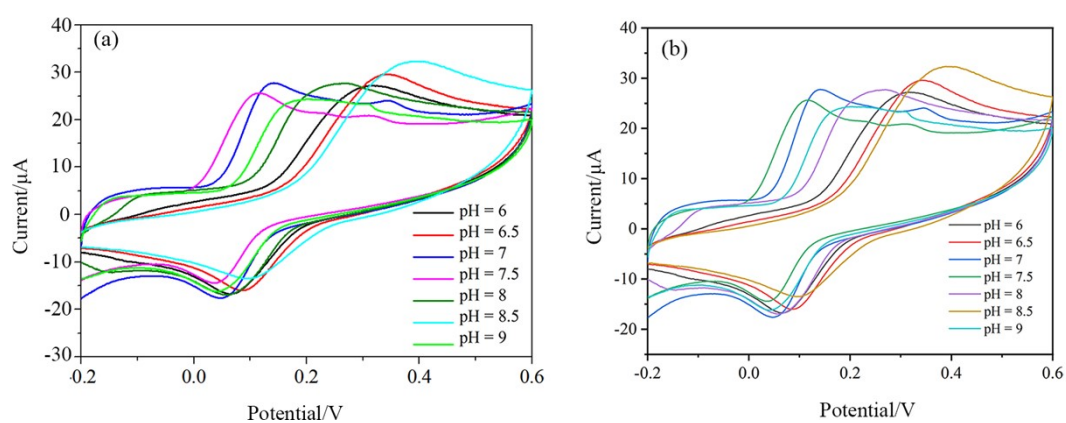

**Fig. S1** (a) and (b) are the CV curves of pH effect based on  $\text{Ni}_3(\text{HITP})_2/\text{AgNSs}$  and  $\text{Ni}_3(\text{HITP})_2/\text{AgNPs}$  electrodes.

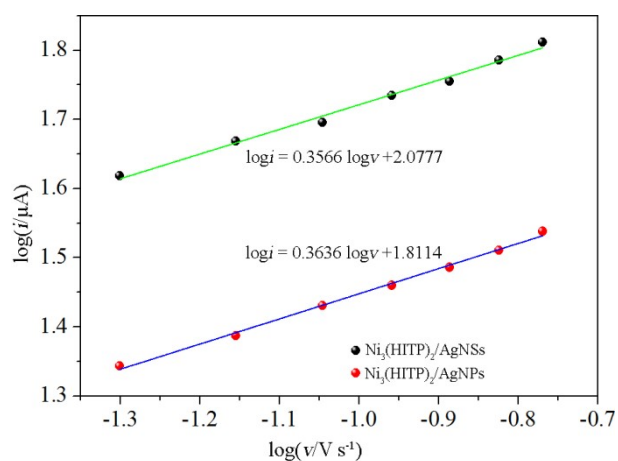

**Fig. S2** The  $\log i$ ~ $\log v$  curves of catechol at different electrodes.

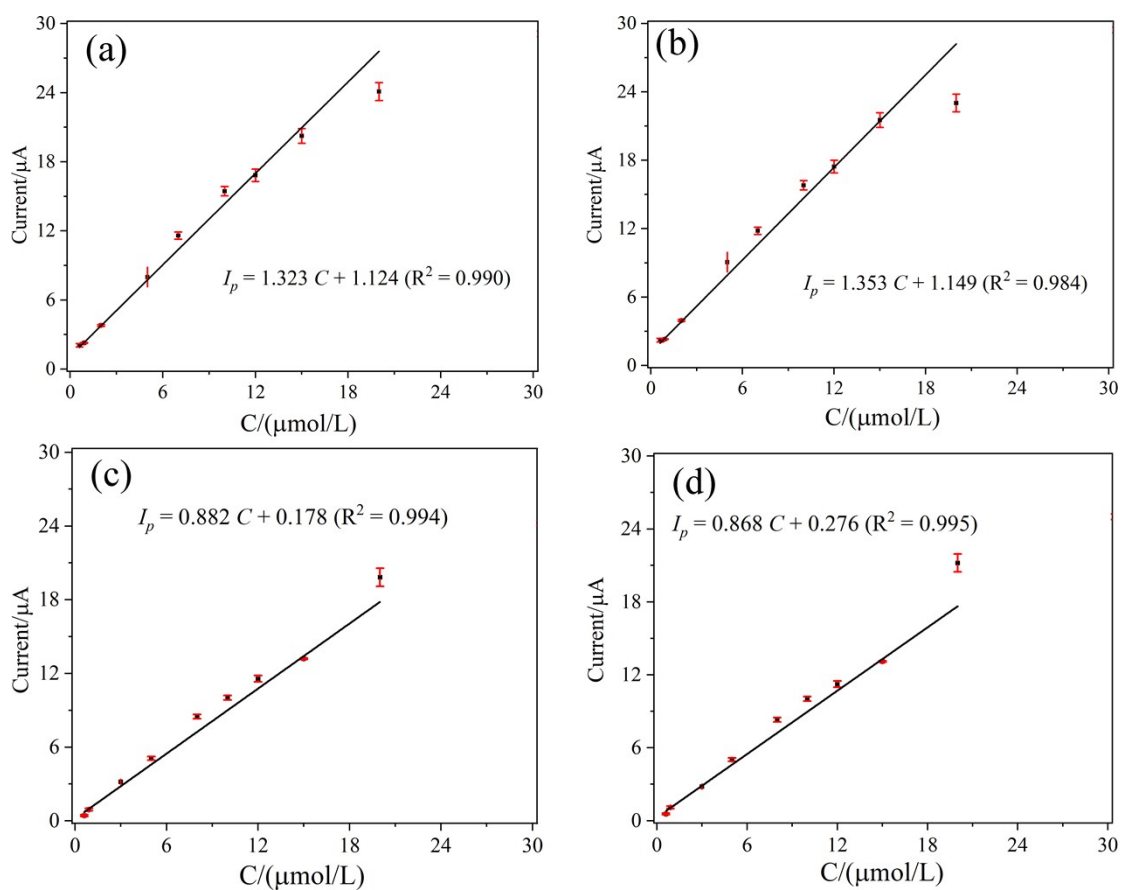

**Fig. S3** (a) and (b) are the parallel results of the calibration curves of  $\text{Ni}_3(\text{HITP})_2/\text{AgNSs}$  with error bars for current~CA concentration, (c) and (d) are the parallel results of the calibration curves of  $\text{Ni}_3(\text{HITP})_2/\text{AgNPs}$  with error bars for current~CA concentration.
